# Supplementary material for: Detecting white matter alterations in multiple sclerosis using advanced diffusion magnetic resonance imaging
Source: PubMed Central journal article supplement — Neural Regen Res. 2019 Jan;14(1):114–23. doi: 10.4103/1673-5374.243716 (PMC6262996; doi:10.4103/1673-5374.243716), 2019-01
Supplement: NRR-14-114_Suppl1.pdf [file NRR-14-114_Suppl1.pdf]

Additional Table 1 Results (q-values) of the pairwise comparisons between the lesion, matched perilesion, and NAWM

| MRI Measure | Patient Number | Set Number | q-value           |             |                 |
|-------------|----------------|------------|-------------------|-------------|-----------------|
|             |                |            | Lesion-Perilesion | Lesion-NAWM | Perilesion-NAWM |
| T2-FLAIR    | 1              | 1          | 1.49E-03          | 1.57E-03    | 2.95E-01        |
| T2-FLAIR    |                | 2          | 1.34E-03          | 1.31E-03    | 2.75E-01        |
| T2-FLAIR    |                | 3          | 4.48E-03          | 4.93E-03    | 2.75E-01        |
| T2-FLAIR    |                | 4          | 4.06E-03          | 3.55E-03    | 2.78E-01        |
| T2-FLAIR    |                | 5          | 5.80E-03          | 6.36E-03    | 2.49E-01        |
| T2-FLAIR    |                | 6          | 3.17E-03          | 3.55E-03    | 2.75E-01        |
| T2-FLAIR    | 2              | 1          | 7.70E-04          | 4.24E-02    | 2.52E-01        |
| T2-FLAIR    |                | 2          | 1.33E-03          | 7.39E-04    | 2.27E-01        |
| T2-FLAIR    |                | 3          | 1.25E-03          | 1.17E-03    | 1.88E-01        |
| T2-FLAIR    |                | 4          | 3.07E-03          | 1.31E-03    | 1.79E-01        |
| T2-FLAIR    |                | 5          | 1.55E-03          | 1.75E-03    | 1.30E-01        |
| T2-FLAIR    |                | 6          | 7.40E-04          | 4.34E-03    | 2.85E-01        |
| T2-FLAIR    | 3              | 1          | 1.12E-03          | 1.17E-03    | 2.75E-01        |
| T2-FLAIR    |                | 2          | 8.01E-04          | 1.06E-03    | 2.92E-01        |
| T2-FLAIR    |                | 3          | 2.23E-03          | 2.06E-03    | 2.90E-01        |
| T2-FLAIR    |                | 4          | 1.50E-03          | 1.39E-03    | 2.87E-01        |
| T2-FLAIR    |                | 5          | 7.57E-04          | 8.11E-04    | 2.63E-01        |
| T2-FLAIR    |                | 6          | 8.21E-04          | 9.19E-04    | 2.49E-01        |
| T2-FLAIR    | 4              | 1          | 4.46E-06          | 6.77E-06    | 2.23E-01        |
| T2-FLAIR    |                | 2          | 6.84E-05          | 2.84E-03    | 2.52E-01        |
| T2-FLAIR    |                | 3          | 3.61E-04          | 3.66E-04    | 2.63E-01        |
| T2-FLAIR    |                | 4          | 1.39E-03          | 1.62E-03    | 2.96E-01        |
| T2-FLAIR    |                | 5          | 3.30E-03          | 3.71E-03    | 2.52E-01        |
| T2-FLAIR    |                | 6          | 4.33E-03          | 4.48E-03    | 2.17E-01        |
| T2-FLAIR    | 5              | 1          | 6.89E-04          | 6.71E-04    | 1.89E-01        |
| T2-FLAIR    |                | 2          | 1.00E-03          | 1.05E-03    | 2.97E-01        |
| T2-FLAIR    |                | 3          | 1.39E-03          | 1.39E-03    | 2.63E-01        |
| T2-FLAIR    |                | 4          | 1.02E-03          | 1.06E-03    | 2.37E-01        |
| T2-FLAIR    |                | 5          | 8.65E-04          | 9.93E-04    | 2.63E-01        |
| T2-FLAIR    |                | 6          | 4.24E-02          | 7.40E-04    | 2.27E-01        |
| T2-FLAIR    | 6              | 1          | 4.04E-06          | 1.16E-04    | 2.73E-01        |
| T2-FLAIR    |                | 2          | 1.14E-04          | 1.07E-04    | 1.89E-01        |
| T2-FLAIR    |                | 3          | 7.39E-04          | 6.59E-04    | 2.77E-01        |
| T2-FLAIR    |                | 4          | 1.62E-03          | 2.06E-03    | 2.73E-01        |
| T2-FLAIR    |                | 5          | 1.93E-03          | 1.80E-03    | 2.52E-01        |
| T2-FLAIR    |                | 6          | 1.84E-03          | 1.93E-03    | 2.82E-01        |
| AD          | 1              | 1          | 5.33E-03          | 5.21E-03    | 2.88E-01        |
| AD          |                | 2          | 6.40E-03          | 8.41E-03    | 2.52E-01        |
| AD          |                | 3          | 1.39E-03          | 1.31E-03    | 2.90E-01        |
| AD          |                | 4          | 8.45E-03          | 6.80E-03    | 3.45E-02        |
| AD          |                | 5          | 2.23E-03          | 2.56E-03    | 1.65E-01        |
| AD          |                | 6          | 2.56E-03          | 3.12E-03    | 1.89E-01        |
| AD          | 2              | 1          | 2.23E-03          | 7.40E-04    | 2.17E-01        |
| AD          |                | 2          | 6.59E-04          | 5.44E-04    | 2.00E-01        |
| AD          |                | 3          | 5.23E-03          | 5.13E-03    | 2.76E-01        |
| AD          |                | 4          | 6.18E-04          | 6.40E-04    | 2.27E-01        |
| AD          |                | 5          | 1.75E-03          | 2.89E-03    | 2.43E-01        |
| AD          |                | 6          | 3.59E-03          | 3.35E-03    | 1.89E-01        |
| AD          | 3              | 1          | 3.02E-03          | 2.89E-03    | 1.60E-01        |
| AD          |                | 2          | 8.02E-03          | 8.34E-03    | 2.17E-01        |
| AD          |                | 3          | 1.82E-04          | 1.76E-04    | 1.28E-01        |
| AD          |                | 4          | 4.37E-04          | 5.21E-04    | 1.50E-01        |
| AD          |                | 5          | 7.39E-04          | 7.24E-04    | 2.75E-01        |
| AD          |                | 6          | 8.65E-04          | 1.49E-03    | 2.27E-01        |
| AD          | 4              | 1          | 1.16E-04          | 1.18E-04    | 9.36E-02        |
| AD          |                | 2          | 1.18E-04          | 1.38E-04    | 1.28E-01        |
| AD          |                | 3          | 2.02E-04          | 2.12E-04    | 1.65E-01        |
| AD          |                | 4          | 1.28E-04          | 4.92E-03    | 9.37E-02        |
| AD          |                | 5          | 1.65E-01          | 1.25E-01    | 1.97E-01        |

|    |   |   |          |          |          |
|----|---|---|----------|----------|----------|
| AD |   | 6 | 3.15E-03 | 2.79E-03 | 1.60E-01 |
| AD | 5 | 1 | 2.10E-03 | 1.99E-03 | 1.29E-01 |
| AD |   | 2 | 1.25E-01 | 3.51E-02 | 1.76E-01 |
| AD |   | 3 | 8.77E-04 | 8.11E-04 | 2.27E-01 |
| AD |   | 4 | 6.81E-04 | 7.45E-04 | 2.52E-01 |
| AD |   | 5 | 6.18E-04 | 4.88E-03 | 2.75E-01 |
| AD |   | 6 | 2.81E-04 | 4.88E-03 | 2.56E-01 |
| AD | 6 | 1 | 1.99E-05 | 1.82E-05 | 5.24E-02 |
| AD |   | 2 | 6.81E-04 | 6.18E-04 | 9.04E-02 |
| AD |   | 3 | 9.19E-04 | 6.81E-04 | 1.63E-01 |
| AD |   | 4 | 1.34E-03 | 1.06E-03 | 1.28E-01 |
| AD |   | 5 | 1.20E-03 | 1.50E-03 | 2.43E-01 |
| AD |   | 6 | 3.15E-03 | 2.73E-03 | 2.37E-01 |
|    |   |   |          |          |          |
| RD | 1 | 1 | 1.38E-04 | 1.18E-04 | 3.87E-02 |
| RD |   | 2 | 1.83E-04 | 5.21E-03 | 1.65E-01 |
| RD |   | 3 | 1.16E-04 | 1.08E-04 | 2.75E-01 |
| RD |   | 4 | 6.95E-04 | 6.71E-04 | 1.60E-01 |
| RD |   | 5 | 4.42E-04 | 3.13E-03 | 1.34E-01 |
| RD |   | 6 | 7.07E-05 | 6.17E-05 | 1.54E-01 |
| RD | 2 | 1 | 2.10E-04 | 2.06E-04 | 1.42E-01 |
| RD |   | 2 | 7.96E-04 | 7.28E-04 | 2.52E-01 |
| RD |   | 3 | 5.42E-03 | 5.21E-03 | 9.36E-02 |
| RD |   | 4 | 4.87E-03 | 4.34E-03 | 6.54E-02 |
| RD |   | 5 | 5.57E-03 | 5.24E-03 | 2.78E-01 |
| RD |   | 6 | 8.38E-03 | 8.26E-03 | 2.73E-01 |
| RD | 3 | 1 | 4.79E-03 | 3.75E-03 | 2.62E-02 |
| RD |   | 2 | 5.33E-03 | 5.80E-03 | 1.12E-01 |
| RD |   | 3 | 3.25E-03 | 2.84E-03 | 1.33E-01 |
| RD |   | 4 | 4.93E-03 | 4.79E-03 | 7.40E-02 |
| RD |   | 5 | 8.82E-04 | 1.06E-03 | 2.46E-02 |
| RD |   | 6 | 6.71E-04 | 8.21E-04 | 2.54E-02 |
| RD | 4 | 1 | 4.70E-06 | 2.21E-05 | 3.67E-02 |
| RD |   | 2 | 2.49E-05 | 3.01E-05 | 7.40E-02 |
| RD |   | 3 | 2.12E-04 | 1.16E-04 | 3.54E-02 |
| RD |   | 4 | 1.68E-04 | 1.83E-04 | 4.24E-02 |
| RD |   | 5 | 2.62E-03 | 2.36E-03 | 3.51E-02 |
| RD |   | 6 | 3.12E-03 | 2.10E-03 | 3.83E-02 |
| RD | 5 | 1 | 2.93E-04 | 2.12E-04 | 3.45E-02 |
| RD |   | 2 | 3.61E-04 | 1.76E-04 | 7.43E-02 |
| RD |   | 3 | 2.12E-04 | 2.93E-04 | 1.60E-01 |
| RD |   | 4 | 2.86E-04 | 2.46E-04 | 1.97E-01 |
| RD |   | 5 | 6.18E-04 | 6.89E-04 | 4.24E-02 |
| RD |   | 6 | 6.71E-04 | 6.89E-04 | 5.68E-02 |
| RD | 6 | 1 | 4.24E-06 | 9.35E-06 | 5.24E-02 |
| RD |   | 2 | 3.33E-05 | 2.90E-05 | 2.52E-01 |
| RD |   | 3 | 1.58E-04 | 1.48E-04 | 1.01E-01 |
| RD |   | 4 | 2.12E-04 | 1.96E-04 | 1.60E-01 |
| RD |   | 5 | 1.96E-04 | 1.96E-04 | 1.27E-01 |
| RD |   | 6 | 2.06E-04 | 2.01E-04 | 1.97E-01 |
|    |   |   |          |          |          |
| MD | 1 | 1 | 1.28E-04 | 3.23E-03 | 4.24E-02 |
| MD |   | 2 | 2.47E-04 | 4.26E-03 | 1.83E-01 |
| MD |   | 3 | 1.36E-04 | 1.49E-03 | 2.78E-01 |
| MD |   | 4 | 1.49E-03 | 3.23E-03 | 1.87E-01 |
| MD |   | 5 | 5.21E-04 | 4.78E-03 | 1.54E-01 |
| MD |   | 6 | 1.47E-04 | 1.89E-04 | 1.97E-01 |
| MD | 2 | 1 | 4.10E-04 | 2.02E-04 | 1.60E-01 |
| MD |   | 2 | 6.71E-04 | 5.43E-04 | 2.54E-01 |
| MD |   | 3 | 5.21E-03 | 4.33E-03 | 1.10E-01 |
| MD |   | 4 | 5.21E-03 | 4.73E-03 | 8.66E-02 |
| MD |   | 5 | 5.24E-03 | 2.09E-03 | 2.90E-01 |
| MD |   | 6 | 5.20E-03 | 5.21E-03 | 2.80E-01 |
| MD | 3 | 1 | 5.21E-03 | 4.33E-03 | 3.51E-02 |

|     |   |   |          |          |          |
|-----|---|---|----------|----------|----------|
| MD  |   | 2 | 5.14E-03 | 5.21E-03 | 1.21E-01 |
| MD  |   | 3 | 2.73E-03 | 3.25E-03 | 1.65E-01 |
| MD  |   | 4 | 4.27E-03 | 3.74E-03 | 9.35E-02 |
| MD  |   | 5 | 3.12E-03 | 1.61E-03 | 3.12E-02 |
| MD  |   | 6 | 7.25E-04 | 1.34E-03 | 2.93E-02 |
| MD  | 4 | 1 | 4.19E-06 | 3.61E-04 | 4.43E-02 |
| MD  |   | 2 | 2.30E-05 | 2.12E-04 | 8.53E-02 |
| MD  |   | 3 | 2.08E-04 | 1.38E-04 | 4.10E-02 |
| MD  |   | 4 | 1.55E-04 | 2.46E-04 | 4.43E-02 |
| MD  |   | 5 | 2.62E-03 | 2.79E-04 | 4.17E-02 |
| MD  |   | 6 | 3.12E-03 | 1.76E-03 | 4.36E-02 |
| MD  | 5 | 1 | 2.93E-04 | 1.06E-03 | 4.17E-02 |
| MD  |   | 2 | 3.61E-04 | 1.76E-04 | 4.43E-02 |
| MD  |   | 3 | 2.12E-04 | 2.93E-04 | 6.44E-02 |
| MD  |   | 4 | 2.86E-04 | 2.46E-04 | 1.65E-01 |
| MD  |   | 5 | 6.18E-04 | 6.89E-04 | 7.72E-02 |
| MD  |   | 6 | 6.71E-04 | 6.89E-04 | 8.60E-02 |
| MD  | 6 | 1 | 1.10E-04 | 9.35E-06 | 8.09E-02 |
| MD  |   | 2 | 8.76E-05 | 2.90E-05 | 2.59E-01 |
| MD  |   | 3 | 2.21E-04 | 2.13E-04 | 1.18E-01 |
| MD  |   | 4 | 3.61E-04 | 1.97E-04 | 1.59E-01 |
| MD  |   | 5 | 2.73E-04 | 1.97E-04 | 1.42E-01 |
| MD  |   | 6 | 3.13E-04 | 2.73E-04 | 2.52E-01 |
|     |   |   |          |          |          |
| FA  | 1 | 1 | 2.50E-02 | 2.06E-02 | 2.75E-01 |
| FA  |   | 2 | 2.24E-02 | 3.09E-02 | 2.92E-01 |
| FA  |   | 3 | 1.30E-01 | 3.09E-02 | 3.51E-02 |
| FA  |   | 4 | 2.52E-01 | 1.01E-01 | 1.89E-01 |
| FA  |   | 5 | 1.30E-01 | 3.51E-02 | 2.71E-02 |
| FA  |   | 6 | 1.42E-01 | 2.93E-02 | 6.47E-02 |
| FA  | 2 | 1 | 1.97E-01 | 1.89E-01 | 9.32E-02 |
| FA  |   | 2 | 1.25E-01 | 1.08E-01 | 2.15E-02 |
| FA  |   | 3 | 4.24E-02 | 3.45E-02 | 2.49E-01 |
| FA  |   | 4 | 3.42E-02 | 7.35E-02 | 2.52E-01 |
| FA  |   | 5 | 3.02E-02 | 2.92E-01 | 2.62E-02 |
| FA  |   | 6 | 2.46E-02 | 1.54E-02 | 2.06E-02 |
| FA  | 3 | 1 | 4.24E-02 | 2.19E-02 | 9.36E-02 |
| FA  |   | 2 | 3.09E-02 | 6.44E-02 | 2.52E-01 |
| FA  |   | 3 | 3.34E-02 | 7.19E-02 | 1.09E-01 |
| FA  |   | 4 | 3.02E-02 | 2.62E-02 | 2.52E-01 |
| FA  |   | 5 | 3.94E-02 | 3.12E-02 | 2.73E-01 |
| FA  |   | 6 | 1.05E-01 | 7.77E-02 | 2.80E-01 |
| FA  | 4 | 1 | 2.54E-05 | 2.74E-05 | 2.06E-02 |
| FA  |   | 2 | 1.47E-04 | 1.83E-04 | 2.42E-02 |
| FA  |   | 3 | 8.92E-03 | 9.77E-03 | 1.46E-01 |
| FA  |   | 4 | 8.63E-03 | 8.92E-03 | 2.27E-01 |
| FA  |   | 5 | 8.58E-03 | 8.63E-03 | 1.65E-01 |
| FA  |   | 6 | 1.04E-02 | 9.82E-03 | 2.52E-01 |
| FA  | 5 | 1 | 1.13E-02 | 8.92E-03 | 2.75E-01 |
| FA  |   | 2 | 9.41E-03 | 1.04E-02 | 2.33E-01 |
| FA  |   | 3 | 9.13E-03 | 8.63E-03 | 1.97E-01 |
| FA  |   | 4 | 9.59E-03 | 1.09E-02 | 2.14E-01 |
| FA  |   | 5 | 9.79E-03 | 1.04E-02 | 2.52E-01 |
| FA  |   | 6 | 1.04E-02 | 1.13E-02 | 2.46E-01 |
| FA  | 6 | 1 | 4.46E-06 | 4.69E-06 | 2.36E-01 |
| FA  |   | 2 | 6.71E-04 | 6.53E-04 | 1.60E-01 |
| FA  |   | 3 | 1.13E-02 | 1.34E-02 | 1.80E-01 |
| FA  |   | 4 | 2.47E-02 | 3.11E-02 | 2.27E-01 |
| FA  |   | 5 | 3.94E-02 | 1.65E-01 | 1.30E-01 |
| FA  |   | 6 | 5.24E-02 | 1.28E-01 | 2.57E-01 |
|     |   |   |          |          |          |
| ODI | 1 | 1 | 4.24E-02 | 5.36E-02 | 1.01E-01 |
| ODI |   | 2 | 9.37E-02 | 1.65E-01 | 1.30E-01 |
| ODI |   | 3 | 1.97E-01 | 1.99E-01 | 9.36E-02 |

|                 |   |   |          |          |          |
|-----------------|---|---|----------|----------|----------|
| ODI             |   | 4 | 3.70E-02 | 3.94E-02 | 2.69E-01 |
| ODI             |   | 5 | 2.27E-01 | 2.54E-01 | 2.14E-01 |
| ODI             |   | 6 | 2.04E-01 | 2.19E-01 | 2.27E-01 |
| ODI             | 2 | 1 | 2.27E-01 | 2.73E-01 | 1.97E-01 |
| ODI             |   | 2 | 1.65E-01 | 9.36E-02 | 2.75E-01 |
| ODI             |   | 3 | 1.12E-01 | 2.52E-01 | 9.11E-02 |
| ODI             |   | 4 | 2.52E-01 | 1.25E-01 | 2.75E-01 |
| ODI             |   | 5 | 2.31E-01 | 2.43E-01 | 2.43E-01 |
| ODI             |   | 6 | 2.02E-01 | 1.93E-01 | 2.22E-01 |
| ODI             | 3 | 1 | 2.52E-01 | 2.63E-01 | 2.54E-01 |
| ODI             |   | 2 | 1.74E-01 | 1.97E-01 | 1.05E-01 |
| ODI             |   | 3 | 4.24E-02 | 1.11E-01 | 1.42E-01 |
| ODI             |   | 4 | 1.05E-01 | 1.24E-01 | 1.09E-01 |
| ODI             |   | 5 | 7.55E-02 | 3.51E-02 | 7.58E-02 |
| ODI             |   | 6 | 1.05E-01 | 4.81E-02 | 5.61E-02 |
| ODI             | 4 | 1 | 2.76E-05 | 2.90E-05 | 3.25E-02 |
| ODI             |   | 2 | 1.08E-04 | 1.28E-04 | 1.01E-01 |
| ODI             |   | 3 | 1.60E-01 | 2.00E-01 | 2.73E-01 |
| ODI             |   | 4 | 1.97E-01 | 9.67E-02 | 1.90E-01 |
| ODI             |   | 5 | 2.53E-01 | 2.31E-01 | 2.73E-01 |
| ODI             |   | 6 | 6.99E-02 | 3.54E-02 | 8.28E-02 |
| ODI             | 5 | 1 | 3.94E-02 | 5.68E-02 | 1.01E-01 |
| ODI             |   | 2 | 5.96E-02 | 2.01E-01 | 2.04E-01 |
| ODI             |   | 3 | 2.27E-01 | 2.52E-01 | 2.22E-01 |
| ODI             |   | 4 | 2.11E-01 | 1.92E-01 | 1.80E-01 |
| ODI             |   | 5 | 2.63E-01 | 2.54E-01 | 2.63E-01 |
| ODI             |   | 6 | 2.41E-01 | 2.68E-01 | 2.75E-01 |
| ODI             | 6 | 1 | 7.10E-06 | 7.17E-06 | 1.03E-02 |
| ODI             |   | 2 | 7.10E-06 | 6.77E-06 | 9.00E-03 |
| ODI             |   | 3 | 1.04E-02 | 8.82E-03 | 2.52E-01 |
| ODI             |   | 4 | 7.77E-02 | 8.46E-02 | 2.75E-01 |
| ODI             |   | 5 | 7.72E-02 | 9.04E-02 | 2.78E-01 |
| ODI             |   | 6 | 2.75E-01 | 2.80E-01 | 2.82E-01 |
| V <sub>ic</sub> | 1 | 1 | 3.62E-05 | 2.32E-05 | 4.11E-05 |
| V <sub>ic</sub> |   | 2 | 1.91E-04 | 3.25E-05 | 8.72E-06 |
| V <sub>ic</sub> |   | 3 | 1.82E-04 | 1.91E-04 | 7.24E-06 |
| V <sub>ic</sub> |   | 4 | 1.42E-04 | 2.12E-04 | 7.24E-06 |
| V <sub>ic</sub> |   | 5 | 1.76E-04 | 1.87E-04 | 4.11E-05 |
| V <sub>ic</sub> |   | 6 | 1.83E-04 | 1.96E-04 | 3.27E-05 |
| V <sub>ic</sub> | 2 | 1 | 3.50E-05 | 4.11E-05 | 9.79E-03 |
| V <sub>ic</sub> |   | 2 | 2.20E-05 | 4.11E-05 | 7.62E-06 |
| V <sub>ic</sub> |   | 3 | 1.96E-04 | 1.96E-04 | 7.17E-06 |
| V <sub>ic</sub> |   | 4 | 1.47E-04 | 2.40E-04 | 4.11E-05 |
| V <sub>ic</sub> |   | 5 | 2.02E-04 | 4.62E-05 | 4.14E-06 |
| V <sub>ic</sub> |   | 6 | 1.87E-04 | 7.73E-05 | 5.05E-05 |
| V <sub>ic</sub> | 3 | 1 | 1.68E-04 | 1.28E-04 | 9.25E-06 |
| V <sub>ic</sub> |   | 2 | 1.96E-04 | 3.90E-05 | 4.53E-05 |
| V <sub>ic</sub> |   | 3 | 2.12E-04 | 5.25E-05 | 9.35E-06 |
| V <sub>ic</sub> |   | 4 | 2.83E-04 | 5.42E-05 | 7.09E-05 |
| V <sub>ic</sub> |   | 5 | 6.84E-05 | 5.14E-04 | 1.46E-05 |
| V <sub>ic</sub> |   | 6 | 2.52E-05 | 6.84E-05 | 9.35E-06 |
| V <sub>ic</sub> | 4 | 1 | 1.70E-07 | 2.83E-07 | 2.83E-07 |
| V <sub>ic</sub> |   | 2 | 1.21E-06 | 1.43E-06 | 1.43E-06 |
| V <sub>ic</sub> |   | 3 | 3.59E-06 | 8.43E-07 | 9.78E-07 |
| V <sub>ic</sub> |   | 4 | 1.60E-06 | 2.48E-06 | 1.14E-05 |
| V <sub>ic</sub> |   | 5 | 6.04E-05 | 6.84E-05 | 1.61E-05 |
| V <sub>ic</sub> |   | 6 | 7.07E-05 | 3.74E-04 | 9.65E-05 |
| V <sub>ic</sub> | 5 | 1 | 8.60E-06 | 2.22E-06 | 2.48E-06 |
| V <sub>ic</sub> |   | 2 | 9.35E-06 | 7.07E-05 | 1.23E-05 |
| V <sub>ic</sub> |   | 3 | 4.96E-05 | 3.97E-04 | 7.62E-06 |
| V <sub>ic</sub> |   | 4 | 1.08E-04 | 1.46E-05 | 1.61E-05 |
| V <sub>ic</sub> |   | 5 | 8.08E-05 | 8.83E-06 | 1.59E-05 |
| V <sub>ic</sub> |   | 6 | 6.19E-05 | 6.69E-05 | 9.32E-02 |

|          |   |   |          |          |          |
|----------|---|---|----------|----------|----------|
| $V_{ic}$ | 6 | 1 | 3.27E-07 | 1.70E-07 | 1.60E-06 |
| $V_{ic}$ |   | 2 | 3.35E-07 | 2.33E-07 | 1.87E-06 |
| $V_{ic}$ |   | 3 | 1.43E-06 | 8.70E-07 | 2.09E-06 |
| $V_{ic}$ |   | 4 | 1.85E-06 | 2.33E-07 | 2.45E-06 |
| $V_{ic}$ |   | 5 | 1.22E-05 | 3.01E-06 | 3.96E-06 |
| $V_{ic}$ |   | 6 | 1.14E-05 | 7.09E-07 | 3.08E-06 |
|          |   |   |          |          |          |
| $P_0$    | 1 | 1 | 7.10E-06 | 8.73E-06 | 1.14E-05 |
| $P_0$    |   | 2 | 6.32E-06 | 7.10E-06 | 1.21E-05 |
| $P_0$    |   | 3 | 8.73E-06 | 9.72E-06 | 6.92E-05 |
| $P_0$    |   | 4 | 3.60E-05 | 4.86E-05 | 9.35E-06 |
| $P_0$    |   | 5 | 2.12E-04 | 4.72E-05 | 9.35E-06 |
| $P_0$    |   | 6 | 4.53E-05 | 2.46E-04 | 3.61E-04 |
| $P_0$    | 2 | 1 | 5.53E-05 | 8.60E-06 | 1.28E-05 |
| $P_0$    |   | 2 | 5.83E-05 | 1.10E-05 | 4.97E-02 |
| $P_0$    |   | 3 | 2.76E-05 | 1.43E-06 | 5.05E-05 |
| $P_0$    |   | 4 | 1.94E-04 | 4.11E-05 | 4.11E-05 |
| $P_0$    |   | 5 | 1.96E-04 | 7.24E-06 | 7.62E-06 |
| $P_0$    |   | 6 | 3.60E-05 | 6.77E-06 | 1.85E-06 |
| $P_0$    | 3 | 1 | 4.86E-05 | 1.26E-05 | 3.27E-06 |
| $P_0$    |   | 2 | 1.46E-05 | 1.14E-05 | 7.10E-06 |
| $P_0$    |   | 3 | 9.75E-06 | 4.46E-06 | 1.12E-02 |
| $P_0$    |   | 4 | 9.26E-06 | 9.35E-06 | 6.54E-06 |
| $P_0$    |   | 5 | 6.08E-05 | 3.62E-05 | 1.51E-05 |
| $P_0$    |   | 6 | 4.62E-05 | 8.73E-06 | 5.81E-05 |
| $P_0$    | 4 | 1 | 2.83E-07 | 1.74E-07 | 2.08E-06 |
| $P_0$    |   | 2 | 1.23E-06 | 3.35E-07 | 1.85E-06 |
| $P_0$    |   | 3 | 1.60E-06 | 1.43E-06 | 1.65E-01 |
| $P_0$    |   | 4 | 1.85E-06 | 3.58E-07 | 4.96E-05 |
| $P_0$    |   | 5 | 2.08E-06 | 1.85E-06 | 1.49E-01 |
| $P_0$    |   | 6 | 1.07E-05 | 1.26E-05 | 1.46E-05 |
| $P_0$    | 5 | 1 | 4.30E-07 | 3.54E-07 | 9.09E-06 |
| $P_0$    |   | 2 | 1.84E-06 | 1.85E-06 | 9.35E-06 |
| $P_0$    |   | 3 | 1.85E-06 | 9.35E-06 | 9.35E-06 |
| $P_0$    |   | 4 | 7.67E-06 | 1.85E-06 | 9.35E-06 |
| $P_0$    |   | 5 | 9.35E-06 | 2.40E-06 | 1.05E-05 |
| $P_0$    |   | 6 | 1.02E-05 | 2.39E-06 | 6.12E-02 |
| $P_0$    | 6 | 1 | 1.74E-07 | 1.70E-07 | 4.07E-07 |
| $P_0$    |   | 2 | 2.83E-07 | 2.83E-07 | 2.48E-06 |
| $P_0$    |   | 3 | 3.35E-07 | 3.35E-07 | 1.46E-06 |
| $P_0$    |   | 4 | 1.43E-06 | 2.83E-07 | 1.85E-06 |
| $P_0$    |   | 5 | 6.21E-06 | 4.70E-06 | 8.31E-02 |
| $P_0$    |   | 6 | 2.76E-05 | 5.94E-06 | 8.73E-06 |

Significant q-values (< 0.05) are highlighted. NAWM: Normal appearing white matter; FLAIR: fluid attenuated inversion recovery; AD: axial diffusivity; RD: radial diffusivity; MD: mean diffusivity; ODI: orientation dispersion index;  $\Psi$ : volume fraction for intra-axonal water;  $\mathbb{P}$ : q-space derived zero-displacement probability.
